# Supplementary material for: Tropical savanna small mammals respond to loss of cover following disturbance: A global review of field studies
Source: Frontiers journal article supplement (doi:10.3389/fevo.2023.1017361), 2023-02-03
Supplement: Table_1.xlsx [file Table_1.xlsx]

## Sheet: Score Sheet 
Supplementary Table S1 (Bergstrom, Scruggs, Vieira, 2023, Frontiers in Ecology and Evolution). Details of studies reviewed in DOI: 10.3389/fevo.2023.1017361.
Paper No.	Continent	Citation	i. Treatment Types	I. Type of Study (Green = ME, Yellow = CM)	II. Replicates?	III. Treatment Effect?	IV. Signifcant effect on species?	V. Treatment effect size	VI. Abundance: A) grass/herb cover? B) shrub cover?*	VII. Species diversity: A) grass/herb cover? B) shrub cover?*	VIII. Food?	Study Conclusions Beige = cover-limited; Green = food-limited; Orange = both; Blue = no treatment effect or inconclusive study	Habitat-related factor
1	Africa	Banasiak and Shrader (2016)	Grass Ht (proxy for LMH)	ME	3 replicates of 4 manipulated grass heights	Response var was GUD, so greater value means more food left in tray, hence greater perceived risk of remaining in habitat. GUD for 5 and 20 cm grass was greater (P < 0.0005) than for 40 and 150 cm tall grass.	Yes, although Mastomys and Mus were pooled (n = 6) as nocturnal, and Rhabdomys (n = 15) was diurnal. Two groups had same mean responses to all grass heights.	N/A, really. Giving Up Distances (GUDs) were 80 g for short grass vs. 75 g for long grass	A) Greater B) N/A	A) N/A B) N/A	N	Both diurnal and nocturnal spp responded same way to cover (grass ht, with a threshold of security around 30 cm). One concern is very small sample size of pooled nocturnal rodents (6 animals); a second is the very small size of sample plots 3m x 3m, which would seem to be a much more micro-scale than an open patch that fire or grazing would produce naturally.	Cover
2	Africa	Bergstrom et al. (2018)	Fi	ME	Yes, 3 replicates	Yes, P = 0.04	Yes for S. mearnsi	Effect size 1.5 (greater density on unburned)	A) Lesser B) Lesser	A) N/A B) N/A	N	Authors suggest that small mammals are cover limited, due to greater grass ht on unburned and greater mammal density; possibility of food limitation for omni-insecti-vores b/c arthropods more abundant on unburned.	Cover
2	Africa	Bergstrom et al. (2018)	LMH (SE a covariate)	ME	Yes, 3 Replicates	Yes, P = 0.03	Yes for Saccostomus mearnsi and Arvicanthis niloticus	Small mammals were 4X more abundant inside glade (enriched) LMH exclosures on black cotton soils than grazed controls. 10X increase inside LMH excl. on enriched red sands soil. Effect size on unenriched red sands was about 8.5 fold. (No comparable unenriched data from black cotton)	A) Greater B) Greater	A) Greater B) Greater	N	Grass height greater on enriched than unenriched matrix sites; and within LMH exclosures than controls. Also, dead-stem density is relatively higher inside LMH exclosures, suggesting low forage quality but high visual cover. Small mammal density highly positively correlated with grass height across all treatments and replicates suggests overarching importance of cover. Some possibility that omni-…	Cover
2	Africa	Bergstrom et al. (2018)	ST	CM	Yes, 4 Replicates	Yes	Arvicanthis niloticus: Yes; P = 0.05 Saccostomus mearnsi: Yes; P = 0.01	Small mammal abundance and diversity were ca. 2X as great on red soil as on black cotton soil	A) Greater B) Greater	A) Greater B) Greater	N	Red soils contain greater shrub cover, and shrub clumps deter grazing, so taller grasses occur in these patches; also, red soil more conducive to stable burrows than black cotton, plus ravines and small escarpments (on red soil and not black cotton) provide escape cover, independent of vegetation	Cover
3	Africa	Blaum et al. (2006)	Sh	CM	Yes, 3 randomly placed grids on each of 16 study sites, stratified to represent range of shrub encroachment (due to cattle grazing)	Regressions. But 3 gerbils decreased with incr Sh; 1 gerbil and Rhabdomys had hump-shaped rel w Sh; all P < 0.05. Total abund also hump-shaped, P < 0.001	Low Shrub: Desmodillus auricularis P < 0.005 Gerbillurus paeba P < 0.03 Gerbilliscus leucogaster P < 0.025 Hump-shaped Shrub: Rhabdomys pumilio P < 0.02 Gerbilliscus brantsii P < 0.03	Rodent species richness decreased with shrub cover (P < 0.001). Total rodent abundance: hump-shaped (P < 0.001) with increasing shrub cover	A) Hump B) Greater	A) Greater B) Lesser	N	3 gerbil spp. were cover-neutral and had increased food supply in open (non-shrub-encroached) habitats ("resource availability hypoth"); 1 gerbil and diurnal striped mouse were cover-sensitive and preferred intermediate shrub cover ("microhabitat selection hypoth"). Note: grass cover increased as shrub cover decreased.	Cover and/or Food
4	Africa	Bowland and Perrin (1989)	LMH	CM	Yes, but only 2 Replicates	Yes		Effect size of approximately 7.1 increase in abundance in LMH zones	A) Greater B) Greater	A) Lesser B) Lesser	N	Author suggest that the small mammals are cover limited, given that cover is lower in the areas with higher grazing, where small-mammal density and recruitment are also lower. Minimal replication reduces explanatory power.	Cover
5	Africa	Fitzherbert, et al. (2006)	Dr	CM	41 sites resampled during dry, intermediate, and wet seasons	Yes, P = 0.01	Saccostomus P = 0.03 Lemniscomys P = 0.01 Tatera P = 0.02 Mus musculoides P = 0.02	Most were caught in the cultivated land and open woodland, but statistical analyses limited to natural habitats, where 2 spp had sufficient sample sizes to test habitat responses.	Saccostomus incr w/ herb + tree cover Lemniscomys incr w/ veget ht Tatera decr w/ herb + tree cover Mus musculoides decr w/ shrub cover	Diversity increased, overall, with increased "cover", overall (whether tree or herbaceous)	N	Some support for enhanced cover (both tree and herbaceous) increasing abundance of some rodents (gerbils have an oppostie response and Mus a partly opposite response). (Mastomys and Aethomys mostly in cultivation so not included in above analyses)	Cover
6	Africa	Hagenah et al. (2009)	LMH	ME	4 replicates of each of 4 diff. types of LMH exclosures (incl. hare) and control. Response variables included grass height and species composition and nutrient content.	Yes. For murid abundance, grass forage quality, and grass height.	Signif. 3-way ANOVA (P = 0.006), though no pairwise comparison results presented.	Roughly 5-fold increases per murid species when hares and LMH fenced out. Freq of hi-quality (lawn) grasses increased 4-fold with fencing. Grass ht increased successively when largest grazers (rhinos) & hares fenced out: ES 4-fold from no-fence to hare-fence	A) Greater B) N/A	Not presented numerically, but Fig. 5 suggests increase in richness and evenness with successive LMH exclosure levels.	Y	One of the few studies that explicitly tested both food quantity/quality and vegetative cover as limiting factors. Meso-herbivores tend to remove higher quality (lawn) grass species and thus affect food, whereas largest LMH primarily reduce grass height and thus reduce visual cover. But even this study cannot rule out unmeasured effects of changes in insect abundance, which the omnivorous murids …	Cover and/or Food
7	Africa	Keesing (1998b)	LMH	ME	Yes, 3 replicates	No	Saccostomus mearnsi; P = 0.005	Effect size of ca. 2X greater abundance of S. mearnsi inside exclosures	This study detected no difference in % vegetative cover between exclosures and controls; did not measure grass height	A) N/A B) N/A	N	Author suggests competition with ungulates for FOOD explains higher N inside exclosure, but this is a speculative, multi-inferential argument: growth rates and home-range sizes were same for exclosure and control, yet mice were signif. heavier in exclosures. We note this could be due to reduced stress from fewer predators (both b/c of fencing and taller grass cover--again, study did not measure g…	Food
8	Africa	Kuiper and Parker (2013)	LMH	CM	Yes , 3 replicates	Discounting trap success, our analysis of MNAs of Rhabdomys pumilio, only (N = 48, 11, 0 on NG, MG, HG) yields X2= 64.3, P= 1.1 e-14.	N/A	Trap success, overall: No grazing vs. High Grazing effect size of 26.9 increase in abundance; Medium grazing vs. high grazing; effect size of 5 increase in abundance. MNAs for R. pumilio: ES 4.4-fold preference for NG over MG sites (0 for HG).	A) Greater B) N/A	A) Greater B) N/A	N	Grass height positively related to rodent abundance and diversity (affected by sheep grazing), significant for Rhabdomys. Authors explain taller grass could provide enhanced cover and/or food resources.	Cover and/or Food
9	Africa	Lloyd and Vetter (2019)	Sh	CM	6 (paired, canopy vs. open)	No	No	No difference in abundance	A) N/A B) N/A	A) N/A B) N/A	Y (N/A)	Generalist rodent changes food habits after woody encroachment (response variable out of scope of this review).	Inconclusive w.r.t. habitat effects on small-mammal abundance, occupancy, or diversity
10	Africa	Loggins, et al. (2019)	Sh	CM	15 transects,each had 5 treatments	Log-linear model approach does not yield P-values	N/A	Up to 10-fold increase in foraging rate from open to under shrub cover (varied widely among transects)	A) Greater B) Greater	A) N/A B) N/A	N	Both proximity to shrub cover and taller grass relate positively to rodent foraging activity in all spp. except Mastomys, which is cover-neutral or even prefers lack of cover	Cover
11	Africa	Long, et al. (2017)	LMH	ME	Yes, 3 replicates of 4 LMH exclusion combinations (ULURU expt)	Yes, P = 0.029	All small-mammal spp pooled for all analyses	Varied from year to year, and somewhat greater in dry season than wet, but roughly 2-fold greater abundance without LMH	A) Greater B) Greater	A) N/A B) N/A	N	Again, this study failed to measure grass height, but small mammals avoided bare-soil areas and preferred tree cover, esp. in dry season. Authors say the effect could be due to either cover or food (no way to distinguish between)	Cover and/or Food
12	Africa	MacFayden, et al. (2012)	Fi	ME	Yes , 3 replicates	No, inconclusive. Almost all Mastomys	N/A	No difference in abundance	A) N/A B) N/A	A) N/A B) N/A	N	Fire has complex effect on Mastomys, but results inconclusive	Inconclusive w.r.t. habitat effects on small-mammal abundance, occupancy, or diversity
13	Africa	Manyonyi et al. (2020)	Fi	ME	2 replicate plots, but BACI design with only 1 sampling period pre-burn and 4 post-burn	Yes, but only for Arvicanthis niloticus.	Mastomys natalensis: Fig. 3B shows the same burn/unburn ratio of N before and after fire, so there is no effect, contrary to authors' conclusion. Arvicanthis niloticus: Fig. 3B shows a reversal of abundance on replicate sites after burn, with error bars indicating significantly greater N on unburned sites after burn	M. natalensis: none A. niloticus: Effect size of 4.6 reduction in abundance following burn	A. niloticus A) Lesser B) Lesser M. natalensis A) None B) None	A. niloticus A) No B) No M. natalensis A) No B) No	N	Authors suggest that Arvicanthis (diurnal) is cover limited but also eats grass seed and leaves, which could be more plentiful in taller grass of unburned sites. Fire had no effect on abundance of Mastomys (which is opportunistic and can find food in disturbed habitats)..	Cover and/or Food
14	Africa	Monadjem (1999)	Fi	Obs	only 2 experimental plots and 1 control plot. Supplemental feeding expt. But an unplanned fire allowed comparison of 2 rodent spp use of burned vs. unburned	Yes	Steatomys pratensis was 8x more abundant (P < 0.05) on burn (24) than unburn (3) 4-8 mos after burn. No diff. up to 3 mos after burn	Steatomys pratensis was 8x more abundant (P < 0.05) on burn (24) than unburn (3) 4-8 mos after burn.	A) N/A B) N/A	A) N/A B) N/A	N	3 mos after fire, no preference by Steatomys for burned or unburned. 4-8 mos after fire, Steatomys preferred burned over unburned areas; by this time, grass height and cover were same between 2 trmts, but green shoots were more abundant in burned plots. But, low power to test in this opportunistic design and small sample size.	Food
15	Africa	Muck and Zeller (2006)	LMH: Cattle vs Wildlife	Obs	None	Not per se, but using repeated samples at each site for n = 8, there was positive regression of abundance on grass cover (P = 0.05), and the wildlife-grazed site had significantly taller grass (P = 0.001) and greater density of small-mammal burrows (P < 0.001) than the cattle-grazed site	All small-mammal spp pooled for all analyses	N/A	A) Greater B) N/A	A) Greater B) N/A	N	Pseudo-replicated study, but significant positive regression of small-mammal abundance with grass cover (includes grass height and coverage). They conclude rodents are probably cover-limited, and talk about how cattle grazing leaves rodents with basal vegetation for tunneling (more rodent spp in cattle plot), whereas wild ungulates, like sheep, graze selectively and remove that basal layer. Autho…	Cover
16	Africa	Okullo et al. (2013)	LMH	ME	Paired block design on termitaria and matrix savanna, with and w/out LMH, 9 reps.	Yes, P < 0.01 for abundance, greater on ungrazed; also greater (P = 0.05) on termitaria	For 5 most abundant (out of 11) spp., nearly all more abundant on ungrazed, both habitats.	130% increase in abundance on ungrazed savanna; 54% increase on ungrazed termitaria	A) N/A B) N/A	Richness higher on ungrazed, but evenness higher on grazed, both habitats	N	Authors conclude positiive effect of LMH exclusion on both habitats could be due either to increased cover (concealment from predators) or increase food (because of increase in forbs inside fencing), or both	Cover and/or Food
17	Africa	Plavsic (2014)	Fi	ME	Yes, 6 replicates	No	N/A	N/A	A) Greater B) Greater	A) No B) No	N	4 of 5 rodent spp were positively assoc with incr veget cover; 3 spp were fire positve and 2 spp. were fire negative. Inidividual life histories determine response. But rainfall determines vegetation recovery after fire.	Cover and/or Food
18	Africa	Saetnan and Skarpe (2006)	LMH	ME	Yes , 3 replicates	Yes, P < 0.005	N/A	Effect size varied by species A) 3.1 increase in Aethomys chrysophilus B) 1.6 increase in Tatera (=Gerbilliscus) leucogaster C) 2.2 increase In all other species combined	A) Greater B) Greater	A) N/A B) N/A	N	Overall, 12 spp small mammals were more abundant inside LMH exclosures because of higher grass cover (and that includes Mastomys!). Steatomys and Elephantulus had opposite association.	Cover
19	Africa	Yarnell, et al. (2007)	Dr	CM	5 plots (not all same!) re-measured across 9 consecutive seasons.	?? Authors state "hi levels of rainfall had positive effect on abund and divers	3 of 8 spp were signif positively correlated w/ incr rainfall, with a time lag.	ES not given; rainfall variable used in correlation and multiple regressions	A) Greater B) N/A	A) No effect B) N/A	N	High rainfall sped up return of grassy vegetation post-burn, resulting in taller and denser grass and increased small-mammal abundance and diversity.	Cover and/or Food
19	Africa	Yarnell, et al. (2007)	Fi	ME	5 plots burned (only 1 control, or unburned, but used Repeated Measures); confounded with hi and low grazing	No signif. effect on overall abundance or diversity	3-mos post-fire no effect on abundance or diversity, but 6-mos, some species responded positively (confounded with rainfall)	Approximate effect size of 2.1 increase in abundance post burn.	A) Greater B) N/A	A) No effect B) N/A	N	Cannot tease out whether food or cover or both, but small-mammal abundance and diversity positively related to grass coverage and height, which both fire and grazing reduce in short term. NOTE: 6 mos after fire, grass ht and coverage signif greater in low-graze plots than hi-graze plots	Cover and/or Food
19	Africa	Yarnell, et al. (2007)	LMH	ME	2 low/3 hi for grazing (no control)	Yes, P < 0.05 for overall; only signif effect per sp. on Mastomys coucha (more abund in low graze)	Mastomys coucha more abundant in low-graze plots, P < 0.001	Effect size of up to 2.4x in small mammal abundance (greater in low graze, which had taller grass) during one winter season within exclusion zones. Other seasons: markedly low to no effect	A) Greater B) N/A	A) No effect B) N/A	N	Cannot tease out whether food or cover or both, but small-mammal abundance and diversity positively related to grass coverage and height, which both fire and grazing reduce in short term.	Cover and/or Food
20	Africa	Yarnell, et al. (2008)	Fi	Obs/RT	No. BACI study pre- and post-fire (1 13-ha area). N = 6 elephant shrews Elephantulus brachyrhynchus; response variables were activity levels and habitat use.	Yes. Animals increased use of thickets, compared to burned grassland, post-fire, P = 0.046. No fire-related difference in activity.	See previous.	Not discernable from paper.	A) N/A B) N/A	A) N/A B) N/A	N	Authors conclude unburned thickets provide cover (predator refuge) after fire removed adjacent grass cover. Small sample size.	Cover
21	Africa	Young , et al. (2015)	LMH	ME/CM (wildlife grazing is ME, other variables CM)	Paired sites (49 pairs of Low/Hi wildlife) but crossing gradients of rainfall, soil, and landuse, so not truly 49 replicates, due to confounding variables	Yes, P = 0.05	N/A	40% greater small-mammal density in low-wildlife vs. hi-wildlife sites in non-pastoral savanna	A) Greater B) N/A	A) Greater B) N/A	N	Authors state 1) vegetative cover and 2) Rainfall are main limiting factors for most small mammal spp (other than those 3 that are disturbance/agriculture specialists, and gerbils, which prefer bare-ground microhabitats). They suggest (in different words) a landscape of fear indirectly--not directly--mediated by predators. NOTE: they measure % cover but NOT grass HEIGHT.	Cover
22	Australia	Abom et al. (2016)	Fi (and grass spp.)	ME	8 replicates per each of 3 grass spp. (2 native, 1 exotic), but fire treatments were BACI: pre-, post- and after regrowth of vegetation (thus no fire control)	Only for fire: Post-burned (P = 0.003) and Reveg (P < 0.001) had lower overall abundance than Pre-burned	Pseudomys gracilicaudatus absent from post-burn, 5-fold less on revegetated. Leggadina highest, overall, on post-burn but depending on grass type	60-100% higher abundance Pre-burn for 1 of 2 native grass spp.; lesser but signif. effect in same direction for other grasses.	A) no B) N/A	A) no B) N/A	N	No control. Most informative habitat variable, overall, was leaf litter, next bare ground; rock cover for Leggadina. Grass cover not informative (study did NOT measure grass height). Fire in exotic grass homogenized habitat, removing leaf litter and logs. No control/manipulation of food, but speculation that rufous bettong increased post-fire due to easier foraging for truffles.	Inconclusive w.r.t. habitat effects on small-mammal abundance, occupancy, or diversity
23	Australia	Davies et al. (2017)	Fi	Obs	82 live-trap and camera-trap (combined) sites on Melville Island, where fire intensity, shrub density, LMH density, and changes in site occupancy by brush-tailed rabbit-rat from 2000-2015 were assessed	Not evaluatable with AIC model-selection method (only yields best set of explanatory variables of change in small mammal's occupancy)	See previous.	N/A, see previous	A) N/A B) Greater	A) N/A B) N/A	N	Conilurus penicillatus site occupancy declined with increased fire) and cattle presence), which correlated with decreased shrub cover and increased feral cat activity--i.e., fire (and LMH) reduced shrub cover, which enhanced cat predation in the "lanscape of fear"	Cover
23	Australia	Davies et al. (2017)	LMH	Obs	82 live-trap and camera-trap (combined) sites on Melville Island, where fire intensity, shrub density, LMH density, and changes in site occupancy by brush-tailed rabbit-rat from 2000-2015 were assessed	Not evaluatable with AIC model-selection method (only yields best set of explanatory variables of change in small mammal's occupancy)	See previous.	N/A, see previous	A) N/A B) Greater	A) N/A B) N/A	N	Conilurus penicillatus site occupancy declined with increased cattle presence (and fire), which correlated with decreased shrub cover and increased feral cat activity--i.e., LMH (and fire) reduced shrub cover, which enhanced cat predation in the "landscape of fear"	Cover
24	Australia	Davies et al. (2018)	Fi	ME	6 replicates of 3 treatments of burn frequency: 1)annual, 2) triennial, 3) long unburned	Overall, for 7 taxa, greater abundance with less frequent fire (AIC approach)	Only signif. preferences: N. brown bandicoot and pale field rat↑ with triennial; grassland melomys ↑ with long unburned.	2-3 fold for 2 triennial spp., 8 fold for melomys. Pyrodiversity (of frequency only) did not maximize overall small-mammal Geometric Mean Abundance as much as having most of the area consist of long-unburned habitat	A) N/A B) N/A	A) N/A B) N/A	N	Did not report on habitat measurements such as vegetative coverage or grass height, but reader can infer long-unburned patches have greater values for these variables. Authors' conclusions are silent to habitat vs. food limitation	Inconclusive w.r.t. habitat effects on small-mammal abundance, occupancy, or diversity
25	Australia	Griffiths and Brook (2015)	Fi	ME	Same Kapalga experimental setup as Pardon et al.: 3 replicates of 4 treatments of burn intensity (increases through dry season)… Included Melomys burtoni along with bandicoot.	Same result as Pardon et al. (varied fire intensity) for N. brown bandicoot, although recruitment more strongly affected than survival. No effect for grassland melomys (M. burtoni).	Only for N. brown bandicoot. No effect on grassland melomys (M. burtoni).	ES very difficult if not impossible to determine from results given, and at any rate variable among the different species.	A) N/A B) N/A	A) N/A B) N/A	N	Did not report on habitat measurements such as vegetative coverage or grass height, but reader might infer that late-season burns (more intense) remove vegetative cover to a greater degree than early-season burns. Authors' conclusions are silent to habitat vs. food limitation	Inconclusive w.r.t. habitat effects on small-mammal abundance, occupancy, or diversity
26	Australia	Kutt and Gordon (2012)	LMH	CM	Yes	None, overall. Signif change over time for 2 spp but not attributable to fire	Only 2 small mammals, but not due to fire	ES not given	A) N/A B) N/A	A) N/A B) N/A	N	One small mouse is disturbance (grazing) tolerant, but other, larger sp. increases in response to more vegetative cover in ungrazed plots.	Cover
27	Australia	Kutt and Woinarski (2007)	Fi	Mx	Reader must infer: 29 sampling sites for 4 treatment combinations (Burn, Graze) would mean 7 replicates.	Yes, P < 0.001	N/A	Effect size of 5 increase in abundance of small mammals approx, 40 months post fire	A) Lesser B) Lesser	A) N/A B) N/A	N	Pseudomys desertor declines in response to both grazing and fire (and both are implicated in its extirpation and endangerment); whereas, P. delicatulis, which prefers open-ground habitats, is enhanced by fire but not by grazing, and the interaction of fire and grazing is more deleterious.	Cover
27	Australia	Kutt and Woinarski (2007)	LMH	ME	See above.	No	N/A	N/A	A) Greater B) Greater	A) N/A B) N/A	N	See above. This was a 2-factor experiment with interaction terms. Cover reduction, per se, negatively affects one mouse regardless the cause, but it enhances forage for the other mouse if by fire (but NOT by grazing).	Cover and/or Food
28	Australia	Lawes, et al. (2015)	Fi	Obs/CM	109 permanent plots sampled 2003 and again 2008.	AIC model-selection approach does not give P values	See previous	N/A, b/c no habitat (vegetation) variables measured; only fire extent and intensity	A) N/A B) N/A	A) N/A B) N/A	N	Fire, especially of large extent and intensity, simplifies habitats, including reducing cover (herbaceous and woody) and "obligate seeder plants" (latter an inference citing other studies) such as conifers that serve as food sources. These effects have led to catastrophic declines of tropical savanna small mammals. No real test of cover vs. food limiation, but discussion allows it could be some o…	Cover and/or Food
29	Australia	Leahy, et al. (2015)	Fi	Obs/RT (ME?)	3? or 1?? One large plot EACH for low, medium, and high intensity burn. Therefore, even though the explan var was manipulated, this is either not an experiment due to lack of replication, or only is if you consider subsampling. NOTE: 3 subplots within each of TWO grassland types in each of 3 burn plots were used for vegetation measurements and mammal trapping.	(Response variable was NOT abundance, rather capture success). Pr(Capture) decreased after 8 weeks in hi-intensity burns compared to Control and Low-intensity burns (P = 0.03)	Yes. Indiv results from Pseudomys nanus and Rattus tunneyi were same as overall result for capture success (P = 0.03; see previous)	High intensity fires had an effect size of 0.05 reduction in trap success post high intensity burn	A) Greater B) Greater	A) N/A B) N/A	N	Increased mortality from predation due to loss of escape cover in intensely burned area. (No direct mortality from fire, and radio-tracking confirmed death by predator and type of predator). Burning NOT assoc with loss of body mass by mammals, indicating that mammals were NOT food-limited in burnt areas.	Cover
30	Australia	Legge, et al. (2008)	Fi	CM	Yes, 6 replicates (burned vs. unburned) sampled 5 weeks after extensive intense fire	Overall, mammals 4X more abundant in unburned than burned sites, P < 0.001	Both Rattus tunneyi and Pseudomys nanus were significantly (P < 0.001) more abundant on unburned sites. A third, smaller, rodent (P. delicatus) did not differ between treatments.	Effect size of ≥ 6x for R. tunneyi and P. nanus abundance. ES 1.5x for mammal species richness (greater on unburned)	A) Lesser B) Lesser	A) Lesser B) Lesser	N	Evidence indicates direct mortality from this extensive fire of ca. 90% of small mammals; the ones that survived were in the unburned refuges. Authors state this is unusual; that most studies report post-fire mortality is mostly indirect, due to increased cat predation and reduced food resources.	Cover
31	Australia	Legge et al. (2011)	LMH	ME	BACI, with 20-43 replicates	Yes, overall; Same for spp diversity	Yes for 4 indiv spp out of 7	ES not given (regressions) but 1 sp appears to increase 10x 3 years after destocking	A) yes, overall, and yes for the 4 spp. B) N/A	A) yes, B) N/A	N	Positive effect of destocking greater for smaller rodents and dayurids than mid-sized. Authors believe increased herbaceous cover provided more cover (mediated by feral cat predation), but possibly also food avail.	Cover and/or Food
32	Australia	Legge et al. (2019)	FI	CM	Not classically replicated. Subsampled 60 sites/year on average over 13 years with expectation of subsamples per treatment combination.	No, not for fire as main effect, only interaction terms with LMH	P values given in SI only for overall	Ambiguous. Some signif main effects for various categories of fire, but ES not given	A) N/A B) N/A	A) N/A B) N/A	N	Authors conclude cover-limitation explains negative response of 4 out of 5 small mammals to fire,as well as abundance, generally, and richness. Note: this is an inference, as they did not measure grass height/cover or other vegetation variables.	Inconclusive w.r.t. habitat effects on small-mammal abundance, occupancy, or diversity
32	Australia	Legge et al. (2019)	LMH	CM	Not classically replicated. Subsampled 60 sites/year on average over 13 years with expectation of subsamples per treatment combination.	Overall abundance P = 0.002 for LMH	P values given in SI only for overall	Up to 2- to 3-fold in certain habitats.	A) N/A B) N/A	A) N/A B) N/A but richness increases with destocking P < 0.0001	N	Authors conclude cover-limitation explains negative response of 4 out of 5 small mammals to LMH. Note: this is an inference, as they did not measure grass height/cover or other vegetation variables.	Cover
33	Australia	McDonald, et al. (2016)	Fi	Obs	76 cameras EACH for rodents and for cats, distributed across 4 sites. Fire a measured variable but not a "treatment"	AIC approach to occupancy modeling. No P values given.	Zyzomys pedunculatus (Rock rat) preferred recently burned areas, whereas Pseudomys desertor preferred unburned areas with greater hummock grass cover.	Not clear.	A) Greater B) Greater	A) N/A B) N/A	Y	Zyzomys may not need grass cover, as it uses rock crevices; however, it forages on early successional forbs, which are more prevalent after a recent burn. Pseudomys seeks cover (from feral cats?) in hummock grasses but also uses the latter as food source.	Cover and/or Food
34	Australia	Ondei, et al. (2020)	Fi	Obs/CM	Multiple transects	Yes. Multivariate model. Small mammals more abundant (P = 0.016) and more diverse (P < 0.01) on unburned than burned.	N/A	Not given (multivariate model)	A) N/A B) N/A ("vegetation" did not have significant effect on small mammal abundance, even though fire frequency did)	A) N/A B) N/A	N	Frequent fire "alters vegetative structure" and reduces both abundance and diversity of savanna small mammals (9 spp.). But food resources (fruits, seeds) may also be more abundant in unburned patches (latter an inference).	Cover and/or Food
35	Australia	Pardon et al. (2003)	Fi	ME	Kapalga fire expt. as in Griffiths and Brook, but with different treatments (intensity rather than freq.): 3 replicates of 4 treatments varying fire timing: 1) unburned, 2) early dry season, 3) late dry season (↑ intensity), 4) progressive (throughout season).	Yes. N. brown bandicoots declined in all trmts (incl controls) but were most severe in late-season burns	AIC model, so no P values.	As much as 3-fold ↓ in survival early vs. late-season/progressive, as inferred from Fig. 3	A) N/A B) N/A	A) N/A B) N/A	N	Northern brown bandicoot (Isoodon macrourus) declined precipitously across region (regardless of treatment or control). No vegetation or other habitat attributes were measured; precipitation was, and it did not predict decline (in multivariate model). Authors conclude that mosaic of low-intensity fires (aboriginal mode) would prevent widespread high-intensity, which is probably causing decline of…	Inconclusive w.r.t. habitat effects on small-mammal abundance, occupancy, or diversity
36	Australia	Penton, et al. (2021) Our Issue	Fi	Obs	Yes, 82 sites with camera traps, each surveyed for eucalypt and tree-hollow abundance, and shrub-cover attributes	No	N/A	N/A	A) N/A B) greater	A) N/A B) N/A	N	Results indicate that shrub cover is the limiting factor for hollow-dependent small mammals and NOT availability of tree hollows. But authors conclude unburned shrub layer could provide either protection from feral cat predation and/or additional food resources.	Cover and/or Food
37	Australia	Radford et al. (2015)	Fi	Obs	49 sampling sites stratified by native habitat type but NOT by burn status (latter measured at each site).	AIC Model selection but overall P based on R-squareds, P < 0.001	See previous, although "strong support" for Pseudomys nanus (↑ ground cover, ↓ distance to unburned edge) and Zygomys argurus (↑ rock crevice and ↓ cattle disturbance). Both P < 0.001	Not discernable.	A) N/A B) N/A	A) No B) No	N	Retention of unburned patches for at least 4 years, and reduced grazing by cattle, provides needed cover, which increases abundance and diversity, overall, of native mammals (NOTE: this includes some larger marsupials and some arboreal spp). Authors' conclusions stress "shelter" provided best by unburned, ungrazed refuges of vegetative cover.	Cover
38	Australia	Radford et al. (2020)	Fi	CM/Obs	n >= 6 sites for each of 6 burn extents on both early dry season (EDS) and late dry season (LDS) burns. But no unburned controls.	Not assessable per se. Total small mammal N increased with increasing extent of EDS burns but decreased with increasing extent of LDS burns	Some spp. were "increasers" and others "decreasers" following implementation of burns, but this was complicated by burn timing and habitat differences.	N/A	A) N/A B) N/A	A) N/A B) N/A	N	This study's demonstration of positive benefits of (early dry season) burning to endangered small mammals in the Northern Kimberley is in contrast to many studies from Northern Australia showing largely negative impacts. But effects are context dependent, and mechanism is unknown (though authors discuss both cover/concealment from predators and food resources as possibly being involved--latter in…	Cover and/or Food
39	Australia	Radford et al. (2021) Our issue	Fi	CM/Obs	94 sites divided between sandstone and volcanic sediment zones (prior burn extent and intensity discovered after sites located, hence the partly Obs nature of the study)	Small-mammal N declined with increased extent of site-scale burns.	Species combined for analysis, and neither number nor identities of spp specified	Not assessible directly with GLM approach	A) greater for perennial B) greater; also greater for rock cover. All: especially at site scale	A) greater for perennial B) greater; also greater for rock cover. All: especially at site scale	N	Feral cat density treated as a third disturbance-related explanatory variable, and all three assessed simultaneously at each site. But authors conclude cat predation is also main mechanism of increased small-mammal mortality and extirpation in areas of reduced rock, shrub, and (perennial) grass cover caused by increased livestock grazing and increased fire extent.	Cover
39	Australia	Radford et al. (2021) Our issue	LMH	CM/Obs	94 sites divided between sandstone and volcanic sediment zones (prior livestock grazing activity discovered after sites located, hence the partly Obs nature of the study)	Small-mammal N declined with increased extent of livestock grazing	Species combined for analysis, and neither number nor identities of spp specified	Not assessible directly with GLM approach	A) greater for perennial B) greater; also greater for rock cover. All: especially at site scale	A) greater for perennial B) greater; also greater for rock cover. All: especially at site scale	N	See above.	Cover
40	Australia	Woinarski et al. (2004)	Fi	CM	Paired comparison with 29 and 39 sites on each of 2 trmts (cattle and no cattle)	No overall effect for small mammals nor for most spp., Sample sizes too small for adequate power for inference.	Pseudomys nanus and Rattus tunneyi were only small mammals to show signif. (0.01 < P < 0.05) before-after change (both increased), but n too small to attribute to fire variables.	No effect for most small-mammal species, and not meaningful for 1 of 2 that changed significantly (had initial N = 0), other-- R. tunneyi -- doubled. Increased mammal richness over time not correlated with fire variables.	A) N/A B) N/A	A) N/A B) N/A	N	Before-after survey was two samples 6 years apart, making it nearly impossible to control for a single explanatory variable (fire). This was a broad-ranging survey of vertebrates, and tests for required sample sizes showed no small-mammal sp. was sufficiently sampled to provide 80% power at obtaining 20% change in abundance.	Inconclusive w.r.t. habitat effects on small-mammal abundance, occupancy, or diversity
41	South America	Briani, et al. (2004)	Fi	CM	6 sites with distinct fire histories sampled, in two distinct phases (3y apart)	Yes	No	N/A	A) N/A B) lesser; Negative correlation (r = -0.81) between abundance and time since last fire (a proxy for tree cover) in one of the phases (replicates?)	A) N/A B) Lesser (r= -0.81 ; p = 0.06 ) in one of the phases	N	Correlation tests (no comparison between control and treatment), but overall, abundance increased with time since burn, as did tree cover.	Cover
42	South America	Camargo, A. C. L. et al. (2018)	Fi	CM	No: 3 control plots, only 1 experimental, but several 900-m2 plots were compared within the burned plot for evaluation post-fire habitat use (mesohabitat scale)	Yes, habitat variables affect small mammals in the mesohabitat scale (RDA, P = 0.001)	Yes, 3 open-area species invaded the dry cerrado forest, occupying plots with higher herbaceous layer, decreased litter depth and less understory obstruction. 3 forest species reduced their abundance	Not discernable.	A) Greater (open-area species in burned dry forests B) Dry forest dwellers were positively associated with understory density or else litter depth and tree diameter.	A) N/A B) N/A	N	RDA analysis accounting for spatial correlation for evaluating effect of habitat variables at 2 distinct scales	Cover
43	South America	Furtado et al. (2021) Our issue	Sh, due to Fi supression	CM	No, survey of the same areas temporally spaced (14 y)	Yes, woody encroachment caused by fire supression affected small mammal community	Yes. total abundance responded to woody density (P = 0.02). Species composition changed: marsupial Cryptonanus chacoensis (P = 0.001), and rodents Cerradomys scotti (P < 0.001) and Necromys lasiurus (P = 0.01 negatively affected by local woody encroachment. Marsupial D. albiventris and rodent Oligoryzomys nigripes positively affected by woody encroachment (P = 0.001 and P < 0.001, respectively).	N/A	A) Rodents Calomys tener (P < 0.001) and Clyomys laticeps (P = 0.01) positively associated with herb cover. B) Overall abundance increased with woody cover (enhanced vegetation index -EVI) and rodents Cerradomys scotti (P = 0.015) and Oligoryzomys nigripes (P = 0.02) positively associated with shrub cover. Rodent Oligoryzomys mattogrossae associated with both herb and shrub habitats (P < 0.001),	A) N/a B) No changes in richness but change in composition	N	Distinct reponses for the small mammal community. Those species often associated with grasslands and open savannas are negatively affected by woody encroachment; while species that rely on tree-covered habitats are likely to benefit from an increasing woody landscape.	Cover
44	South America	Ghizoni, Jr., et al. (2005)	Fi	CM	Yes, 40 replicates (regression design); sampled equally in wet/dry seasons, and measured burn extent only as response variable (thus, fire not part of design)	Yes, significant effect with PCA axis including the proportion of open ground, trees, shrubs, tall grasses, and short grasses. Also, invertebrate availability (P = 0.007) regressed on Necromys pop growth rate.	Yes, P = 0.016, Necromys lasiurus pop. growth rate	N/A (regression design)	A) greater* B) greater*º (*positive with PCA axis combining tree, shrub, and small grass cover; non-significant relationship with tall grasses)	A) N/A B) N/A (population study)	Y	Necromys lasiurus λ responds positively to increased cover, and to increased invertebrate availability, independent of vegetative variables.	Cover and/or Food
45	South America	Layme, et al. (2004)	Fi	CM	Regression w/ 31 sampling grids; opportunistic sampling after patchy burn	Yes, invertebrate availability (P < 0.001)	Yes, Necromys lasiurus (pop. growth rate)	N/A, but R2 = 0.53	A) No Effect A) No Effect	A) No Effect B) No Effect	Y	Study established no link between either fire or season on the one significant limiting factor (invertebrate prey avail.) and no fire or season effect on rodent abundance, but significant positive effect of invertebrate availabilty on Necromys lasiurus λ	Inconclusive w.r.t. habitat effects on small-mammal abundance, occupancy, or diversity
46	South America	Vieira (1999)	Fi	CM/Obs	No, 2 plots with distinct fire histories sampled 1 yr before and after a prescribed fire	Yes	Yes (X2 tests indicate significant short-term changes in species composition (3 most commmon species) in both areas (P < 0.003 and P < 0.001)	Not discernable.	short-term (up to 6 mo) reduction in abundance of the rodent N. lasiurus but increase for 2 Calomys species (both grass and shrub cover increased during this period)	A) No changes in diversity caused by fire B) No changes in diversity caused by fire	N	Post-fire changes in cover caused changes in species dominance, but no reduction in richness or diversity, burning reduces plant cover	Cover
47	South America	Vieira and Marinho-Filho (1998)	Fi	Obs	1 plot sampled before and after fire	Yes	N/A	N/A	A) Two rodents (Oxymycterus roberti and Necromys lasiurus) reduced abundance after fire (drastic reduction of grass cover), abundance increased as grass recovered after fire B) N/A	A) N/A B) N/A	N	Before-and-after fire study (8 weeks after fire). Inference: cover limitation, given that burning affects plant cover	Cover
48	South America	Vieira et al. (2005)	Sh (microhabitat structure, 8 variables)	Obs	Yes (Cerradomys scotti = 13 ind, Necromys lasiurus = 9 ind.)	N/A	Yes, species select distinct habitat characteristics (Discriminant analysis, P < 0.01).	N/A	A) Microhabitat study, both species associated with greater grass height B) N/A	A) N/A B) N/A	N	Microhabitat study, based on spool-and-line tracking of 2 rodents	Cover
49	South America	Becker et al. (2005)	Dr	CM	Yes (4 plots in the dry-wet season and 6 in the rainy season)	No	No (only the dominant species was tested (Necromys lasiurus)	N/A	A) N/A B) N/A	A) N/A B) N/A	N	No seasonal effect on richness or abundance of the dominant species (Necromys lasiurus)	Inconclusive w.r.t. habitat effects on small-mammal abundance, occupancy, or diversity
50	South America	Henriques and Alho (1991)	Sh (microhabitat structure, 8 variables)	Obs	Capture points (n = 60) are the sample units (multiple regression model), response variable is number of captures in each capture point	Yes	Yes, for Necromys lasiurus and Oxymycterus roberti	N/A	2 species respond to both A and B. Regression analysis showed that the most important estimator of N. lasiurus abundance was higher grass ground cover and tree and shrub cover. For O. roberti, plant species richness, forb ground cover, and tree and shrub cover	A) N/A B) N/A	N	Two murid spp. Increase in abundance with increased aspects of cover (of grass, shrub, and/or tree)	Cover
51	South America	Rocha et al. (2011)	Sh (microhabitat structure, 5 variables)	Obs	Capture points (n = 200) are the sample units (multiple regression model), response variable is number of captures in each capture point	Yes, RDA indicates relation between grass height and species abundance	Yes, for Necromys lasiurus and Calomys tener	N/A, but microhabitat variables alone explained 21% of the community composition (P < 0.001)	A) abundance of N. lasiurus positively related to grass cover and C. tener negatively related to grass cover	A) N/A B) N/A	N	Two murid spp. Had opposite response to grass cover, but overall, small mammal abundance increased with increasing grass height.	Cover
52	South America	Vieira and Briani (2013)	Fi	CM	3 sites sampled before and up to 6 months after fire (burned at distinct periods - during early, mid and late dry season) each one with 1 unburned control sampled simultaneously (so not fully replicated).	Yes, significant shift to a more invertebrate-based diet after fire considering the 4 most common species	N/A	N/A	Abundance of Necromys lasiurus decreases after fire and 2 Calomys increase; not tested statistically	A) N/A B) N/A	Y	Significant effect of fire on diet (MANOVA P < 0.001; dietary shifts are out of the scope of our review). No conclusive results on effect of fire on abundance, occupancy, vital rates of small mammals.	Inconclusive w.r.t. habitat effects on small-mammal abundance, occupancy, or diversity
53	South America	Owen (2013)	Fi	CM	No, evaluation of fire effects (before-and-after) in two distinct grids without simultaneous control (before-and-after experiment)	N/A	On Grid A (burned only once, at the beginning of the study), C. callosus was negatively associated with TIME SINCE BURNING (F(1) = 29.35, r = -0.363, P = 0.002), and N. lasiurus was positively associated (F(1) = 10.86, r = 0.652, P = 0.016).	Significant associations with fire, though not attributable to any habitat-mediated effects.	Abundance of Necromys lasiurus increases with since time burning (increase in both grass and woody cover) and abundance of Calomys callosus decreases with time since burning	No important association was identified of either species richness or diversity with time since last burn (TSB) for 2 distinct grids.	N	Evaluation of fire effects (before-and-after) in two distinc grids without simultaneous control. No important association was identified of either species richness or diversity with time since last burn (TSB) for 2 distinct grids. On Grid A (burned only once, at the beginning of the study), C. callosus was negatively associated with TSB (F(1) = 29.35, r = -0.363, P = 0.002), and N. lasiurus was p…	Inconclusive w.r.t. habitat effects on small-mammal abundance, occupancy, or diversity
54	South America	Santos and Henriques (2010)	Sh (microhabitat structure)	CM	7 sites	N/A	N/A	N/A	N/A	A) N/A B) No	N	(N = 7, study indicates a significant relationship between community composition (1st MDS axis and plant complexity PCA axis indicating gradient with increased plant height and increase in the number of plants) but no clear relation between habitat structure and richness	Inconclusive w.r.t. habitat effects on small-mammal abundance, occupancy, or diversity
55	South America	Durigan et al. (2020)	FI	ME	Yes, but only 2 burned and 2 unburned plots	No	N/A	N/A	A) No B) No	A) No B) No	N	Changes in habitat cover caused by fire did not affect species composition (very low values of dissimilarity index between burned and unburned plots), richness (comparison between rarefaction curves with highly overlapping 95% CI's), or abundance (visually inferred from a graphic) over a year after fire	Inconclusive w.r.t. habitat effects on small-mammal abundance, occupancy, or diversity

## Sheet: Legend 
Legend
Treatment Types
LMH	Large mammalian herbivore exclusion/inclusion
Fi	Fire
Sh	Shrub encroachment or removal
SE	Soil enrichment
ST	Soil Type
IS	Invasive species introduction or removal
Dr	Drought, or rain seasonality (wet vs. dry)
Types of Study
Obs	Observational. Study involves no created or naturally occurring "treatments"; researcher does not assign sampling units based on a priori knowledge of natural variablity but only examines this a posteriori.
CM	Comparative mensurative experiment. Nature creates "treatments"-- i.e., natural variation in the explanatory variable(s) which is known to researcher a priori; researcher chooses [randomly?] from them.
ME	Manipulative experiment. Experimenter creates the treatments and assigns multiple sampling units randomly to each treatment.
Mx	Mixed (This is usually between CM and ME)
RT	Radio Tracking

## Sheet: Columns
Columns*
i.	What type of treatments are being implemented? (LMH,Fi, Sh, SE, ST, IS, DR)
I.	What type of study is being performed? (Ob, CM, ME, or MX)
II.	Is the experiment replicated (requires 2, but usually 3, replicates)? (Yes(Y) or No(N))
III.	Is there a significant (P < 0.05) treatment effect for the assemblage of small mammals? (if (Y), give P value) or (N)
IV.	Is there a signficant treatment effect for a single species? If ((Y), give P value) or (N) List genus, species
V.	What is the treatment effect size? (e.g. 57% greater abundance on treatment B as compared to treatment A)
VI.	For Significant results : A) Is the abundance greater or lower with increased grass/herb cover? B) Is the abundance greater or lower with increased shrub cover?
VII.	A) Is species diversity greater or lower with increased grass/herb cover? B) Is species diversity greater or lower with increased shrub cover?
VIII.	Food? Did study manipulate, measure, or control for food resources simultaneous to habitat manipulations? Yes (Y) or No (N)
*If a study had more than one treatment type, questions I-VII were answered for each treatment type
